# Supplementary material for: Surgery versus prolonged conservative treatment for sciatica: 5-year results of a randomised controlled trial
Source: PubMed Central journal article supplement — BMJ Open. 2013 May 15;3(5):e002534. doi: 10.1136/bmjopen-2012-002534 (PMC3657649; doi:10.1136/bmjopen-2012-002534), 2013-05-15
Supplement: bmjopen-2012-002534.draft_revisions.pdf [file bmjopen-2012-002534.draft_revisions.pdf]

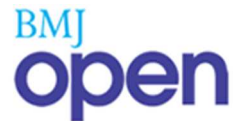

**Surgery versus prolonged conservative treatment for  
sciatica:  
5-year results of a randomised controlled trial**

|                                 |                                                                                                                                                                                                                                                                                                                                                                                                                                                                                                                                                                                                                                                         |
|---------------------------------|---------------------------------------------------------------------------------------------------------------------------------------------------------------------------------------------------------------------------------------------------------------------------------------------------------------------------------------------------------------------------------------------------------------------------------------------------------------------------------------------------------------------------------------------------------------------------------------------------------------------------------------------------------|
| Journal:                        | <i>BMJ Open</i>                                                                                                                                                                                                                                                                                                                                                                                                                                                                                                                                                                                                                                         |
| Manuscript ID:                  | bmjopen-2012-002534.R2                                                                                                                                                                                                                                                                                                                                                                                                                                                                                                                                                                                                                                  |
| Article Type:                   | Research                                                                                                                                                                                                                                                                                                                                                                                                                                                                                                                                                                                                                                                |
| Date Submitted by the Author:   | 05-Apr-2013                                                                                                                                                                                                                                                                                                                                                                                                                                                                                                                                                                                                                                             |
| Complete List of Authors:       | lequin, michiel; Department of Neurosurgery. Neurosurgical Center Amsterdam, Academic Medical Center<br>Verbaan, Dagmar; Department of Neurosurgery. Neurosurgical Center Amsterdam, Academic Medical Center<br>Jacobs, Wilco; Leiden University Medical Center, Neurosurgery<br>Brand, Ronald; Leiden University Medical Center, Medical Statistics and BioInformatics<br>Bouma, Gerrit; Department of Neurosurgery. Neurosurgical Center Amsterdam, Academic Medical Center<br>Vandertop, William; Department of Neurosurgery. Neurosurgical Center Amsterdam, Academic Medical Center<br>Peul, Wilco; Leiden University Medical Center, Neurosurgery |
| <b>Primary Subject Heading</b>: | Neurology                                                                                                                                                                                                                                                                                                                                                                                                                                                                                                                                                                                                                                               |
| Secondary Subject Heading:      | Surgery, General practice / Family practice, Evidence based practice                                                                                                                                                                                                                                                                                                                                                                                                                                                                                                                                                                                    |
| Keywords:                       | NEUROSURGERY, Spine < ORTHOPAEDIC & TRAUMA SURGERY, Neurological pain < NEUROLOGY, Pain management < ANAESTHETICS, Neurosurgery < SURGERY, Clinical trials < THERAPEUTICS                                                                                                                                                                                                                                                                                                                                                                                                                                                                               |
|                                 |                                                                                                                                                                                                                                                                                                                                                                                                                                                                                                                                                                                                                                                         |

SCHOLARONE™  
Manuscripts

1  
2  
3  
4  
5  
6  
7  
8  
9  
10  
11  
12  
13  
14  
15  
16  
17  
18  
19  
20  
21  
22  
23  
24  
25  
26  
27  
28  
29  
30  
31  
32  
33  
34  
35  
36  
37  
38  
39  
40  
41  
42  
43  
44  
45  
46  
47  
48  
49  
50  
51  
52  
53  
54  
55  
56  
57  
58  
59  
60

Surgery versus prolonged conservative treatment for sciatica:  
5-year results of a randomised controlled trial

Michiel B. Lequin, MD, Dagmar Verbaan, PhD , Wilco C.H. Jacobs MSc, Ronald Brand, PhD, Gerrit J. Bouma, MD, PhD, William P. Vandertop, MD, PhD, Wilco C. Peul, MD, PhD, for the Leiden-The Hague Spine Intervention Prognostic Study Group

For peer review only

## ARTICLE SUMMARY

### Article Focus

- The sciatica trial, a randomised controlled trial, showed no significant differences after one and two years of follow-up in disability and pain between patients with severe sciatica for six to eight weeks, allocated for either early surgery or six months of prolonged conservative care
- 20% of all patients reported an unsatisfactory recovery after two years. In this study the five years' follow-up is described and predictors for unsatisfactory recovery are identified

### Key Messages

- 8% of all patients never showed any recovery
- In 23% of all patients sciatica results in ongoing complaints, which fluctuate over time, irrespective of treatment
- A strategy of prolonged conservative care with eventually delayed surgery gives a high chance of pain and disability to resolve, although 46% of these patients needed surgery after a few more months of prolonged suffering
- Age over 40 years, severe leg pain at baseline and a higher affective McGill pain score were predictors for an unsatisfactory recovery

### Strengths and Limitations

- Five years' follow-up results of a randomised controlled trial
- 18% of the patients were lost to follow-up at five years
- No difference in baseline characteristics between dropouts and patients providing the five years' data

**Abstract:**

## Objective

This study describes the five years' results of the Sciatica trial focused on pain, disability, (un)satisfactory recovery, and predictors for unsatisfactory recovery.

## Design

A randomised controlled trial.

## Setting

Nine Dutch hospitals

## Participants

Five years' follow-up data from 231 of 283 patients (82%) were collected.

## Intervention

Early surgery or an intended six months of conservative treatment

## Main Outcome measures

Scores from Roland disability questionnaire, visual analogue scale for leg and back pain and a Likert self rating scale of global perceived recovery were analysed.

## Results

There were no significant differences between groups on the five years' primary outcome scores. Despite at least six months of conservative treatment 46% of the conservatively allocated patients were treated surgically because of severe leg pain and disability. Forty-nine (21%) patients had an unsatisfactory recovery at five years and the recovery pattern showed that there was a variable group of 66 patients (31%) with at least one unsatisfactory outcome at one, two or five years of follow-up. Multivariate logistic regression showed that age (>40; OR: 2.42 (95% CI: 1.16-5.02)), severity of leg pain (VAS>70; OR: 3.32 (95% CI: 1.69-6.54)), and the Mc Gill affective score (score>3; OR: 6.23 (95% CI: 2.23-17.38)) were the only significant predictors for an unsatisfactory outcome at five years.

## Conclusions

In the long term, 8% of the patients with sciatica never showed any recovery and in at least 23%, sciatica appears to result in ongoing complaints, which fluctuate over time, irrespective of treatment. Prolonged conservative care might give patients a fair chance for pain and disability to resolve without surgery, but with the risk to receive delayed surgery after prolonged suffering of sciatica. Age above 40 years, severe leg pain at baseline and a higher affective Mc Gill pain score were predictors for unsatisfactory recovery. Trial Registry ISRCT No 26872154.

## Introduction

The lumbosacral radicular syndrome (LSRS), caused by a herniated lumbar disc, is one of the most expensive disorders for society in terms of work absenteeism and disability<sup>1</sup>. In 2007, the Sciatica Trial showed that the clinical outcome after one year was not different from prolonged conservative treatment, although recovery within the first year was better with early surgery<sup>2</sup>. In the prolonged conservative treatment group however, 39% of patients crossed over to surgical treatment because of intractable pain within one year, and 44% within two years of follow-up<sup>3</sup>. Despite the fact that this study showed, along with other randomised controlled trials<sup>4, 5-7</sup>, that a strategy of prolonged conservative care is safe and reduces the risk for patients of undergoing surgery, the optimal timing of surgery with regard to long-term outcome has still not been defined.

Although LSRS is described in the literature as having a quite favourable course, one might question this assumption as the two years' follow-up showed that about twenty percent of patients report an unsatisfactory outcome on all outcome scales and that the risk to suffer prolonged disability is higher than expected beforehand<sup>2;3</sup>.

The primary aim of the present study is to compare the pain and disability scores at five years' follow-up between patients in the Sciatica Trial randomised for surgery or randomised for prolonged conservative treatment. The second aim is to evaluate the proportion of patients with an unsatisfactory recovery at five years' follow-up and to identify factors contributing to these unsatisfactory results.

## Material and Methods

### Design

The study is part of the Sciatica Trial, a multicentre, prospective randomised trial among patients with 6 to 12 weeks of sciatica to determine whether a strategy of early surgery leads to better outcomes during the first year than does a strategy of prolonged conservative treatment for an additional six months followed by surgery for those patients who do not improve.

In summary, patients, 18-65 years of age, with an LSRS with a concomitant disc herniation confirmed by MRI, were eligible for participation. A computer-generated permuted-block scheme was used for randomisation stratified by centre. In the

1  
2  
3 surgical intervention group, a disc herniation removal through a unilateral transflaval  
4 approach using optical magnification was performed. Prolonged conservative  
5 treatment regimen was defined by general practitioners and treatment was mainly  
6 aimed at resuming daily activities. Patients were notified beforehand that they were  
7 participating in a study comparing two different strategies for the timing of  
8 intervention rather than comparing surgery with non-surgical treatment.  
9 The design and study protocol have been published previously<sup>2,8</sup>. Baseline  
10 characteristics from the Sciatica Trial have been published previously<sup>2,3</sup> and were  
11 combined with the findings obtained from the five years' follow-up of the participants.  
12  
13  
14  
15  
16  
17  
18

### 19 Procedures

20  
21 As a standard procedure, the participants received the same study questionnaires as  
22 used for the one and two- year follow-up every year. At approximately five years after  
23 study inclusion, the participants were contacted once again by mail but now with an  
24 accompanied letter and asked to fill out the study questionnaires as used for the one  
25 and two-years' follow-up with extra questions about re-operations. Patients who did  
26 not respond initially, were contacted by telephone by a research nurse and asked  
27 once again to participate in the study by filling out the questionnaires. The additional  
28 5 years' assessment was approved by the local medical ethics committee.  
29  
30  
31  
32  
33  
34  
35

### 36 Primary and secondary outcomes

37  
38 Primary outcome measures consisted of the Roland disability questionnaire (RDQ)  
39 for sciatica<sup>9</sup>, a 100 mm visual analogue scale (VAS) for leg pain<sup>10</sup>, and a seven-point  
40 Likert score of global perceived recovery. Higher RDQ and VAS scores were  
41 indicative of the experience of worse disability or greater intensity of pain,  
42 respectively. Global perceived recovery was measured with a 7-point Likert self-  
43 rating scale. Complete or almost complete disappearance of complaints (Likert  
44 scores 1-2) was defined as "satisfactory recovery", whereas Likert scores 3-7 were  
45 defined as "unsatisfactory recovery"<sup>2,8</sup>.  
46  
47  
48  
49  
50

51 Secondary outcomes were a 100 mm VAS for back pain and the number of  
52 (re)operations for severe sciatica in the interval between two and five years. The  
53 number of (re)operations for severe sciatica was evaluated by asking patients  
54 whether there had been any new operations for severe sciatica in the interval  
55  
56  
57  
58  
59  
60

1  
2  
3 between two and five years. Additionally, in all participating centres it was checked  
4 whether patients had had a treatment because of sciatica in the intervening period.  
5  
6

### 7 8 Potential prognostic factors

9  
10 The prognostic value of demographic and clinical baseline variables for  
11 unsatisfactory recovery at five years was evaluated. The initial list of prognostic  
12 factors, chosen in advance by the investigators, was based on potential clinical  
13 importance, as indicated by earlier clinical results<sup>11-13</sup> The following potential  
14 prognostic demographic variables were included in the analysis: age (dichotomised  
15 <40/≥ 40), gender, smoking status, BMI (dichotomised <25/≥ 25), physical job  
16 (yes/no), or mentally demanding job (yes/no).  
17  
18

19 The following clinical baseline variables were included in the analysis: level of  
20 herniation at the MRI, the presence of a sequester on MRI (yes/no), sciatica  
21 provoked by sitting (yes/no), sciatica provoked by coughing/sneezing (yes/no),  
22 outcome of Bragard's test (positive/negative), sensory disturbance (yes/no).  
23  
24

25 Furthermore, the following measurement instruments for general health, mental  
26 health, affective score and pain were included: the VAS scores for leg pain, back  
27 pain and general health, the Mental Health subscore of the Medical Outcomes Study  
28 36-Item Short-Form General Health Survey (SF-36)<sup>14</sup>, and the McGill affective  
29 score<sup>2</sup>. The VAS score range from 0-100, with higher scores indicating more severe  
30 symptoms. For this analysis, dichotomised VAS scores were used (<70/≥70), as  
31 described in an earlier study<sup>2</sup>. The SF-36 Mental Health score ranges from 0 to 100,  
32 with higher scores indicating less severe symptoms. For this analysis, dichotomised  
33 SF-36 Mental Health subscores were used (scores below one standard deviation of  
34 the dutch reference population<sup>1</sup> were defined as impaired). The McGill affective score  
35 measures the qualitative perception of pain by the patient and ranges from 0-5 where  
36 a high score (3-5) is correlated with a more depressed and anxious mood. For this  
37 analysis, dichotomised McGill affective scores were used (<3/≥3)<sup>2</sup>.  
38  
39  
40  
41  
42  
43  
44  
45  
46  
47  
48  
49  
50

### 51 **Statistical analysis**

52  
53 The original sample size calculation was based on a difference in RDQ outcome  
54 during and in a different speed to recovery during the first year. The main endpoint  
55 "recovery" is in principle time-dependent in the sense that it reflects the situation of a  
56 patient at a particular moment in time and the situation may also deteriorate  
57  
58  
59  
60

1  
2  
3 afterwards, so it can change from recovered to non-recovered and back to recovered  
4 again, therefore actually being a time-varying dichotomous outcome which should be  
5 taken into account when interpreting the results of the analyses. Differences between  
6 randomisation groups at baseline and after five years of follow-up were assessed by  
7 comparing means, medians, or percentages, depending on the type of variable.  
8  
9 Baseline values of variables were used as covariates in the main analyses whenever  
10 appropriate to adjust for possible differences between the randomised groups and to  
11 increase the power of the analyses. Outcomes of function and pain over the entire  
12 follow-up period were analysed using a repeated measurements analysis of variance  
13 with a first order autoregressive covariance matrix. Estimated consecutive scores  
14 were expressed as means and 95% confidence intervals. Pointwise estimates were  
15 obtained using models with time as a categorical covariate to allow assessment of  
16 systematic patterns. Differences between groups in the dichotomised Likert score at  
17 five years were evaluated with Fisher's exact test (randomisation group) or Mann-  
18 Whitney U (disability and pain scores).

19  
20 The analyses were done according the intention-to-treat principle, except the  
21 comparison of groups with a satisfactory or unsatisfactory recovery.

22  
23 Univariate and multivariate analyses were performed to evaluate the prognostic value  
24 of baseline variables for an unsatisfactory outcome at five years. The results are  
25 presented as odds ratios (ORs) with 95% confidence intervals (CIs). Chi-square tests  
26 were used to perform the univariate analyses. Potential predictors with a  $p < 0.10$  in  
27 the univariate analysis were included in the multivariate logistic regression. The  
28 multivariate logistic regression model was performed in a backward approach and  
29 included randomisation group irrespective of its significance in the univariate  
30 analysis, to control for its influence on the dependent variable.

31  
32 For all other analyses,  $p < 0.05$  was considered significant. Data collection and quality  
33 checks were performed with the ProMISe web-based secure data management  
34 system of the Department of Medical Statistics and Bioinformatics of Leiden  
35 University Medical Centre. For all statistical analyses, SPSS version 18.0 was used.

## 52 53 Results

54  
55 Fifty-two of the 283 patients (18%) were lost to follow-up, among them one patient  
56 who died after a cardiac bypass operation and 19 patients who refused to participate.  
57 The baseline characteristics age, gender, BMI, randomization group, RDQ, and VAS-



1  
2  
3 scores were not significantly different between the dropouts and those patients  
4 providing the five years' follow-up data. Twenty-six of the dropouts were randomised  
5 for early surgery. Among the 26 dropouts in the prolonged conservative group, 11  
6 (42%) had surgery for sciatica during follow-up.  
7

8  
9  
10 At five years' follow-up, 66 of the 142 patients (46%) assigned to conservative  
11 treatment had had surgery because of intractable sciatica (table 1). Within the first  
12 year this was 55 (39%) and after two years 62 (44%). Of the 141 patients allocated  
13 for early surgery, 16 (11%) recovered before surgery and were not operated on  
14 during the five years of follow-up. Within this five years' period, nine patients (7%) in  
15 the early surgery group and eight of the conservatively allocated patients who had  
16 surgery (12%), needed recurrent disc surgery. Three patients in the conservative  
17 group needed two re-operations or more (table 1).  
18

19  
20  
21 The primary and secondary outcome scores concerning disability, leg pain and back  
22 pain at five years were slightly higher in the early surgery group compared to the  
23 prolonged conservative group, however, there were no significant differences (table  
24 2, fig 1a-c).  
25

26  
27  
28 In the total group, after five years, 49 (21%) patients still had an unsatisfactory  
29 recovery, defined as not having a complete or almost complete recovery on the  
30 dichotomised Likert scale, irrespective of their allocated treatment group (25 patients  
31 in the prolonged conservative group, 24 patients in the early surgery group,  $p=1.00$ ).  
32 Patients with an unsatisfactory recovery had a significantly higher amount of leg pain,  
33 back pain and disability (all  $p$ -values  $<0.01$ ) compared to the group with a satisfactory  
34 recovery (table 3). At five years' follow-up, 93 patients (62 men and 31 women, mean  
35 age 43.7, SD 9.8) had not had surgery (76 from the conservative group and 16 from  
36 the early surgery group) and the percentage recovered (77%) or not-recovered at five  
37 years (23%) was not different from the total group.  
38

39  
40  
41 In the period of five years, 66 of the 213 patients (31%) with collected data at one,  
42 two and five years of follow-up had at least one period of unsatisfactory recovery.  
43 The pattern of recovery showed 16 patients who did not report any recovery at one,  
44 two and five years of follow-up. Twenty-four patients switched from 'not recovered' in  
45 the first or second year to 'recovered' at the five-years' analysis. Sixteen of these  
46 patients were from the prolonged conservative group. Six of these patients needed  
47 an operation of whom four needed a re-operation before they recovered, compared  
48 to two of the eight patients in the early surgery group needing a re-operation. Twenty-  
49  
50  
51  
52  
53  
54  
55  
56  
57  
58  
59  
60

1  
2  
3 six patients showed a good recovery at one and/or two years but not at five years of  
4 follow-up (fig 2).

5  
6 Univariate logistic regression evaluating the relationship between possible prognostic  
7 variables and unsatisfactory recovery at five years, irrespective of intermediate  
8 recovery, showed that a high McGill affective score (score > 3; OR 6.23 (95% CI:  
9 2.23-17.38)) was a significant predictor, as were severe leg pain at baseline (VAS >  
10 70; OR 2.95 (95% CI: 1.54-5.64), an impaired score on the SF-36 Mental Health  
11 subscale (OR 2.25 (95% CI: 1.16-4.35)), higher age (age > 40; OR 2.22 (95% CI:  
12 1.11-4.47)), and a positive Bragard test (OR 1.91(95% CI: 0.97-3.74)) (table 4). The  
13 multivariate analysis included all variables that were related to unsatisfactory  
14 outcome in the univariate analysis ( $p < 0.10$ ), as well as randomisation group. This  
15 analysis showed that a high McGill affective score (score > 3; OR: 4.48 (95% CI:  
16 1.43-14.08)), severity of leg pain (VAS > 70; OR: 2.80 (95% CI: 1.39-5.62)), and age  
17 (age > 40 years; OR: 2.36 (95% CI: 1.12-5.00)) were the only significant predictors  
18 for an unsatisfactory outcome at five years.  
19  
20  
21  
22  
23  
24  
25  
26  
27  
28

## 29 Discussion

30  
31 This long-term follow-up study of the same patient cohort corroborates with earlier 1  
32 and 2 year results as no significant differences between randomisation groups in  
33 disability, leg pain or back pain are found after five years of follow-up<sup>2,3</sup>. Eighteen  
34 percent of the initial cohort of 283 patients was lost to follow-up after five years. This  
35 reduced the power of our latest analysis to some extent. However, the baseline  
36 characteristics showed no differences between the included group and the dropouts.  
37 The allocated strategy of an extra six months of wait-and-see resulted in a large  
38 proportion of delayed surgical treatment (46%) for persistent intense leg pain causing  
39 severe disability, despite all kinds of conservative treatment. This means that patients  
40 should be informed that prolonged conservative care gives them quite a high chance  
41 for resolution of pain and disability without the need of a surgical intervention, but that  
42 this strategy also carries a fair chance (46%) that this waiting for the pain to resolve  
43 will still end with them needing disc surgery.  
44  
45  
46  
47  
48  
49  
50  
51  
52

53 The question however, is whether this conclusion is completely accurate. The design  
54 of the original study was a comparison of early surgery versus prolonged  
55 conservative care for six months, after which surgery was offered when there still  
56 were severe complaints. This means that we do not know the precise percentage of  
57  
58  
59  
60

1  
2  
3 patients who would have become pain free with even longer conservative care,  
4 because the majority of these patients was operated on after six months. But on the  
5 other hand one might question whether such a proposed long conservative regimen  
6 is in proportion with the small risk of a surgical intervention, which provides a better  
7 outcome in the first six months, rather than being disabled in daily life during this long  
8 period of conservative care. Furthermore, the proportion of patients who were not  
9 operated after five years with a satisfactory or unsatisfactory recovery was the same  
10 as in the total population, showing that also in the non-operated patients there was a  
11 rather high amount of unsatisfactory recovery.  
12

13  
14  
15  
16  
17  
18 Twenty-one percent of patients experienced unsatisfactory recovery at five years,  
19 while 31% of the patients with complete data at one, two and five years of follow-up  
20 noted at least once an unsatisfactory recovery during this five years' follow-up period,  
21 irrespective of their allocated group. So the optimal timing of surgery is still on  
22 debate, as is the question which patients would benefit from surgery and which from  
23 prolonged conservative care.  
24

25  
26  
27  
28 The study design of this five year analysis did not permit us to look properly for the  
29 causes of an unsatisfactory recovery. A shortcoming of this study is the fact that  
30 there was no permission in the present study to retrieve new MR-images, but a  
31 recent study with the same patient population did not show any correlation between  
32 MR-images and satisfactory or unsatisfactory recovery at one year<sup>15</sup>.  
33

34  
35  
36  
37  
38  
39  
40  
41  
42  
43  
44  
45  
46  
47  
48  
49  
50  
51  
52  
53  
54  
55  
56  
57  
58  
59  
60  
The patterns of recovery show that 8% of all patients with collected data, had never  
had any recovery during the follow-up period, showing that there are not that many  
non-responders of conservative or surgical treatment. The other 50 patients (23%)  
with an unsatisfactory recovery showed a switch over time from recovered to not-  
recovered, or vice versa. This is in line with the idea that sciatica is caused by  
chronic disc disease with intermittent nerve compression or inflammation and that  
pain can thus re-occur despite any earlier treatment<sup>16;17</sup>. In the 24 patients who  
switched from 'not-recovered' in the first or second year to 'recovered' at the five-  
years' analysis, there was a higher amount of patients who needed a re-operation  
before recovery occurred in the prolonged conservative group compared to the early  
surgery group. This may be caused by less effectiveness of late surgery, although  
this could not be proven. This less effectiveness of late surgery compared to early  
surgery could be caused by more chronic changes around the disc protrusion or  
sequester, causing more difficulty in freeing the nerve from compression.

1  
2  
3 In our study we could not estimate the effect of early versus late surgery, or surgery  
4 versus conservative treatment in an unbiased way since that would require a per  
5 protocol analysis. This would ignore the randomised allocation and compare patients  
6 who by definition would be incomparable since the design of our study did not  
7 envisage a randomisation between early and late surgery but merely allowed for the  
8 time of surgery being determined by the assessment of both patient and physician  
9 after initial randomisation. The impossibility to capture completely the condition of the  
10 patient and the selection mechanism which leads to the decision to operate, or not, at  
11 any given point in (follow-up) time, renders any multivariate analysis that attempts to  
12 make the groups of early and late operations comparable, biased. This bias has  
13 occurred in other randomised studies where this “per protocol” analysis was used  
14 and patients who were operated on after a prolonged duration of symptoms from a  
15 herniated lumbar disk have been shown to have a worse outcome than patients who  
16 were operated on relatively early<sup>18-21</sup>. As a consequence of this “per protocol analysis  
17 both groups differed in baseline characteristics such as type of disc herniation,  
18 neurological deficit and reported depression, rendering comparison of both groups  
19 fallacious<sup>21</sup>.

20  
21 In this five-years’ analysis the independent prognostic factors for an unsatisfactory  
22 outcome were a high McGill affective score, a high amount of leg pain, and age over  
23 40 years at baseline. A high McGill affective score correlates with a more depressed  
24 and anxious mood<sup>2</sup>, and mental stress, depression or other psychological factors  
25 have been widely described as risk factors for development of chronic pain<sup>22</sup>.

26  
27 Although a high amount of pain at baseline can also be caused by psychological  
28 factors, it is an independent prognostic factor for an unsatisfactory outcome in this  
29 study. Perhaps the severity of nerve root compression at intake predicts the overall  
30 outcome, but a correlation between amount of pain and amount of root compression  
31 has not been proven<sup>23</sup>. In our study, other factors concerning the severity of nerve  
32 root damage, such as severe sensibility disturbance, showed no association. In a  
33 systematic review of non-surgically treated sciatica none of the three studies that  
34 investigated baseline leg pain severity showed a clear prognostic influence on  
35 outcome. Age was also not found to be a prognostic factor in six out of seven  
36 studies<sup>24</sup>. The reason for age over 40 years being a prognostic indicator for a  
37 unsatisfactory outcome could be because disc herniation is part of a degenerative  
38 disease which seems to worsen in time. A study of prognostic factors for  
39  
40  
41  
42  
43  
44  
45  
46  
47  
48  
49  
50  
51  
52  
53  
54  
55  
56  
57  
58  
59  
60

1  
2  
3 unsatisfactory recovery among operated and unoperated patients did not show leg  
4 pain severity and age to be a prognostic factor, but found the variables severe back  
5 pain and male gender as predictors for a bad outcome at the one year follow-up<sup>24;25</sup>.  
6  
7 This was in contrast with our one year study where being female was a prognostic  
8 factor for a bad outcome, but in this five years' analysis this also disappeared. The  
9 possible prognostic role of gender might be over-estimated in the past.  
10  
11  
12

## 13 14 15 16 **Conclusion**

17  
18 After five years of follow-up there were still no differences in pain and disability  
19 between the patients randomised for early surgery or prolonged conservative care.  
20 Signs of pain quality associated with depression and a more anxious mood, the age  
21 of the patient and the severity of leg pain at baseline were predictive of an  
22 unsatisfactory outcome.  
23  
24  
25  
26

27  
28 In general, patients must be informed that prolonged conservative care might give  
29 them a fair chance for pain and disability to resolve without surgery, but with the risk  
30 for delayed surgery in the end after a prolonged period of suffering from sciatica.  
31  
32  
33

34  
35 Furthermore, although the total number of disabled patients without pain free periods  
36 in this study seems to be low, in almost one fourth of the patients, sciatica appears to  
37 be an ongoing disease with variable complaints in time, irrespective of treatment.  
38 These patients need our full attention, and further investigation at 10 years' follow-up  
39 is being planned, because this patient category has the highest burden on society  
40 concerning work absenteeism and general health costs.  
41  
42  
43  
44  
45

46  
47 Data sharing: No additional data available.

48  
49 **Contributors:** The participants in the Leiden-The Hague Spine Intervention Prognostic Study  
50 Group were: protocol committee, WCP, BWK, and RTWMT; steering committee, BWK,  
51 RTWMT, JAH Eekhof, JTJ Tans, WBvdH, WCP, RB, and HC van Houwelingen; statistical  
52 analysis, WBvdH; research nurses and data collection and management, M Nuyten, P  
53 Bergman, G Holtkamp, S Dukker, A Mast, L Smakman, C Waanders, L Polak, A Nieborg;  
54 coordinating physicians of participating hospitals, JTJ Tans, R Walchenbach (Medical Center  
55 Haaglanden, The Hague), J van Rossum, P Schutte, RTWMT (Diaconessen Hospital,  
56  
57  
58  
59  
60

1  
2  
3 Leiden), GAM Verheul, JE Dalman, JAL Wurzer (Groene Hart Hospital, Gouda), JWA Sven,  
4 A Kloet (Reinier de Graaf Hospital, Delft/Voorburg), ISJ Merkies, H van Dulken (Spaarne  
5 Hospital, Heemstede/Haarlem), PCLA Lambrechts, JAL Wurzer (Bronovo Hospital, The  
6 Hague), RWM Keunen, CFE Hoffmann (Haga Hospital, The Hague), J Haan, H van Dulken  
7 (Rijnland Hospital, Leiderdorp/Alphen ad Rijn), R Groen, RRF Kuiters (Lange Land Hospital,  
8 Zoetermeer), RAC Roos, JHC Voormolen (Leiden University Medical Center, Leiden), JAH  
9 Eekhof (Public Health and Primary Care, Leiden University, Leiden). WCP is guarantor for  
10 the study. All authors have read and approved the final manuscript.  
11  
12  
13  
14

15 **Competing Interests:** None

16 **Funding:** None  
17  
18  
19  
20  
21  
22  
23  
24

#### 25 Reference List

- 26  
27 (1) van Tulder MW, Koes BW, Bouter LM. A cost-of-illness study of back pain in The  
28 Netherlands. *Pain* 1995; 62(2):233-240.  
29  
30 (2) Peul WC, Van Houwelingen HC, van den Hout WB, et al. Surgery versus prolonged  
31 conservative treatment for sciatica. *N Engl J Med* 2007; 356(22):2245-2256.  
32  
33 (3) Peul WC, van den Hout WB, Brand R, et al. Prolonged conservative care versus early  
34 surgery in patients with sciatica caused by lumbar disc herniation: two year results of a  
35 randomised controlled trial. *BMJ* 2008; 336(7657):1355-1358.  
36  
37 (4) Jacobs WC, van TM, Arts M, Rubinstein SM, et al. Surgery versus conservative  
38 management of sciatica due to a lumbar herniated disc: a systematic review. *Eur Spine*  
39 *J* 2011; 20(4):513-522.  
40  
41 (5) Weinstein JN, Lurie JD, Tosteson TD, et al. Surgical vs nonoperative treatment for  
42 lumbar disk herniation: the Spine Patient Outcomes Research Trial (SPORT)  
43 observational cohort. *JAMA* 2006; 296(20):2451-2459.  
44  
45 (6) Weinstein JN, Tosteson TD, Lurie JD, et al. Surgical vs nonoperative treatment for  
46 lumbar disk herniation: the Spine Patient Outcomes Research Trial (SPORT): a  
47 randomized trial. *JAMA* 2006; 296(20):2441-2450.  
48  
49 (7) Weinstein JN, Lurie JD, Tosteson TD, et al. Surgical versus nonoperative treatment  
50 for lumbar disc herniation: four-year results for the Spine Patient Outcomes Research  
51 Trial (SPORT). *Spine (Phila Pa 1976)* 2008; 33(25):2789-2800.  
52  
53 (8) Peul WC, Van Houwelingen HC, van der Hout WB, et al. Prolonged conservative  
54 treatment or 'early' surgery in sciatica caused by a lumbar disc herniation: rationale  
55  
56  
57  
58  
59  
60

- 1  
2  
3 and design of a randomized trial [ISRCT 26872154]. *BMC Musculoskelet Disord*  
4 2005; 6:8.  
5  
6 (9) Patrick DL, Deyo RA, Atlas SJ, et al. Assessing health-related quality of life in  
7 patients with sciatica. *Spine (Phila Pa 1976 )* 1995; 20(17):1899-1908.  
8  
9 (10) Collins SL, Moore RA, McQuay HJ. The visual analogue pain intensity scale: what is  
10 moderate pain in millimetres? *Pain* 1997; 72(1-2):95-97.  
11  
12 (11) Hurme M, Alaranta H. Factors predicting the result of surgery for lumbar  
13 intervertebral disc herniation. *Spine (Phila Pa 1976 )* 1987; 12(9):933-938.  
14  
15 (12) Peul WC, Brand R, Thomeer RT, et al. Influence of gender and other prognostic  
16 factors on outcome of sciatica. *Pain* 2008; 138(1):180-191.  
17  
18 (13) Vroomen PC, de Krom MC, Knottnerus JA. Predicting the outcome of sciatica at  
19 short-term follow-up. *Br J Gen Pract* 2002; 52(475):119-123.  
20  
21 (14) Brazier JE, Harper R, Jones NM, et al. Validating the SF-36 health survey  
22 questionnaire: new outcome measure for primary care. *BMJ* 1992; 305(6846):160-  
23 164.  
24  
25 (15) el BA, Vleggeert-Lankamp CL, Nijeholt GJ, et al. Magnetic resonance imaging in  
26 follow-up assessment of sciatica. *N Engl J Med* 2013; 368(11):999-1007.  
27  
28 (16) Omarker K, Myers RR. Pathogenesis of sciatic pain: role of herniated nucleus  
29 pulposus and deformation of spinal nerve root and dorsal root ganglion. *Pain* 1998;  
30 78(2):99-105.  
31  
32 (17) Mulleman D, Mammou S, Griffoul I, et al. Pathophysiology of disk-related sciatica. I-  
33 -Evidence supporting a chemical component. *Joint Bone Spine* 2006; 73(2):151-158.  
34  
35 (18) Jonsson B. Patient-related factors predicting the outcome of decompressive surgery.  
36 *Acta Orthop Scand Suppl* 1993; 251:69-70.  
37  
38 (19) Ng LC, Sell P. Predictive value of the duration of sciatica for lumbar discectomy. A  
39 prospective cohort study. *J Bone Joint Surg Br* 2004; 86(4):546-549.  
40  
41 (20) Nygaard OP, Kloster R, Solberg T. Duration of leg pain as a predictor of outcome  
42 after surgery for lumbar disc herniation: a prospective cohort study with 1-year follow  
43 up.[see comment]. *J Neurosurg Pediatrics* 2000; 92(2 Suppl):131-134.  
44  
45 (21) Rihn JA, Hilibrand AS, Radcliff K, et al. Duration of symptoms resulting from lumbar  
46 disc herniation: effect on treatment outcomes: analysis of the Spine Patient Outcomes  
47 Research Trial (SPORT). *J Bone Joint Surg Am* 2011; 93(20):1906-1914.  
48  
49 (22) Pincus T, Burton AK, Vogel S, et al. A systematic review of psychological factors as  
50 predictors of chronicity/disability in prospective cohorts of low back pain. *Spine*  
51 *(Phila Pa 1976 )* 2002; 27(5):E109-E120.  
52  
53  
54  
55  
56  
57  
58  
59  
60

- 1  
2  
3 (23) Aaronson NK, Muller M, Cohen PD, et al. Translation, validation, and norming of the  
4 Dutch language version of the SF-36 Health Survey in community and chronic disease  
5 populations. *J Clin Epidemiol* 1998; 51(11):1055-1068.  
6  
7 (24) Ashworth J, Konstantinou K, Dunn KM. Prognostic factors in non-surgically treated  
8 sciatica: a systematic review. *BMC Musculoskelet Disord* 2011; 12:208.  
9  
10 (25) Haugen AJ, Brox JI, Grovle L, et al. Prognostic factors for non-success in patients  
11 with sciatica and disc herniation. *BMC Musculoskelet Disord* 2012; 13:183.  
12  
13  
14  
15  
16  
17  
18  
19  
20  
21  
22  
23  
24  
25  
26  
27  
28  
29  
30  
31  
32  
33  
34  
35  
36  
37  
38  
39  
40  
41  
42  
43  
44  
45  
46  
47  
48  
49  
50  
51  
52  
53  
54  
55  
56  
57  
58  
59  
60



**Table 1: Baseline and follow-up characteristics of patients with sciatica**

| Patient characteristics                      | Early surgery<br>(n=141) | Conservative<br>treatment (n=142) |
|----------------------------------------------|--------------------------|-----------------------------------|
| <b>Baseline characteristics</b>              |                          |                                   |
| Mean (SD) age (years)                        | 41.6 (10.0)              | 43.3 (9.6)                        |
| Male sex                                     | 89 (63)                  | 97 (68)                           |
| Mean (SD) BMI                                | 25.9 (4.1)               | 25.5 (3.3)                        |
| Mean (SD) duration of sciatica (weeks)       | 9.43 (2.37)              | 9.48 (2.11)                       |
| Took sick leave from work                    | 107 (76)                 | 116 (82)                          |
| Mean (SD) duration of sick leave (weeks)     | 5.32 (2.78)              | 5.28 (2.62)                       |
| Left sided leg pain                          | 67 (48)                  | 73 (51)                           |
| Positive straight leg raising test (SLR)     | 100 (71)                 | 104 (73)                          |
| Positive crossed SLR                         | 71 (50)                  | 70 (49)                           |
| Dermatomal sensory loss                      | 123 (87)                 | 128 (90)                          |
| Dermatomal anaesthesia                       | 31 (22)                  | 33 (23)                           |
| Dermatomal muscle weakness                   | 93 (66)                  | 99 (70)                           |
| Knee tendon reflex difference                | 54 (38)                  | 51 (36)                           |
| Ankle tendon reflex difference               | 75 (53)                  | 107 (75)                          |
| Clinically suspected level of herniated disc | -                        | -                                 |
| L3-L4                                        | 6 (4)                    | 4 (3)                             |
| L4-L5                                        | 65 (46)                  | 52 (37)                           |
| L5-S1                                        | 70 (50)                  | 86 (61)                           |
| Preference for conservative treatment        | 42 (30)                  | 43 (30)                           |
| Mean (SD) RD score                           | 16.5 (4.4)               | 16.3 (3.9)                        |

|    |                        |             |             |
|----|------------------------|-------------|-------------|
| 1  |                        |             |             |
| 2  |                        |             |             |
| 3  | Mean (SD) VAS score    | -           | -           |
| 4  |                        |             |             |
| 5  | Leg pain               | 67.3 (19.6) | 64.3 (21.2) |
| 6  |                        |             |             |
| 7  | Back pain              | 34.0 (29.6) | 30.8 (27.7) |
| 8  |                        |             |             |
| 9  | Mean (SD) SF-36 scores | -           | -           |
| 10 |                        |             |             |
| 11 | Bodily pain            | 21.9 (16.6) | 23.9 (18.1) |
| 12 |                        |             |             |
| 13 | Physical functioning   | 33.9 (19.6) | 34.6 (19.0) |
| 14 |                        |             |             |
| 15 |                        |             |             |

### 16 Surgical treatment during follow-up

|    |                                              |              |              |
|----|----------------------------------------------|--------------|--------------|
| 17 |                                              |              |              |
| 18 |                                              |              |              |
| 19 | Surgery performed in first year              | 125 (89)     | 55 (39)      |
| 20 |                                              |              |              |
| 21 | Surgery performed during 2 years             | 125 (89)     | 62 (44)      |
| 22 |                                              |              |              |
| 23 | Surgery performed during 5 years             | 125 (89)     | 66 (46)      |
| 24 |                                              |              |              |
| 25 | Recurrent disc surgery after 5 years         | 9 (6)        | 8 (6)        |
| 26 |                                              |              |              |
| 27 | follow-up                                    | 9 of 125 (7) | 8 of 66 (12) |
| 28 |                                              |              |              |
| 29 | Patients requiring two re-operations or more | 0            | 3            |
| 30 |                                              |              |              |
| 31 | Patients who dropped out during 5 year       | 26 (18)      | 26 (18)      |
| 32 |                                              |              |              |
| 33 |                                              |              |              |
| 34 |                                              |              |              |

35 Values are numbers (percentages) unless stated otherwise.

Table 2: Primary and secondary outcomes from early surgery (ES) versus prolonged conservative treatment (CT) for patients with sciatica

| Outcome     | 8 weeks    |            |                        | 52 weeks   |            |                        | 104 weeks  |            |                        | 260 weeks  |            |                        |
|-------------|------------|------------|------------------------|------------|------------|------------------------|------------|------------|------------------------|------------|------------|------------------------|
|             | ES         | PCT        | Difference<br>[95% CI] |
| Disability* | 6.1 (0.5)  | 9.2 (0.5)  | 3.2 [1.9-4.4]          | 3.3 (0.5)  | 3.7 (0.5)  | 0.4 [-0.8-1.7]         | 3.4 (0.5)  | 2.6 (0.5)  | -0.8 [-2.1-0.5]        | 3.5 (0.5)  | 3.4 (0.5)  | -0.1 [-1.4-1.3]        |
| Leg pain**  | 10.2 (1.9) | 27.9 (1.9) | 17.7 [12.5-22.9]       | 11.0 (1.9) | 10.9 (1.9) | -0.1 [-5.3-5.1]        | 10.9 (2.0) | 8.8 (2.0)  | -2.0 [-7.5-3.4]        | 15.6 (2.0) | 12.8 (2.0) | -2.7 [-8.4-2.9]        |
| Back pain** | 14.4 (2.4) | 25.7 (2.4) | 11.3 [4.6-18.0]        | 14.6 (2.4) | 16.0 (2.4) | 1.4 [-5.3-8.2]         | 16.0 (2.6) | 17.0 (2.5) | 1.0 [-6.0-8.1]         | 20.0 (2.6) | 17.0 (2.6) | -3.1 [-10.3-4.2]       |

\* Roland disability questionnaire for sciatica. Score ranges from 0 to 23, with higher scores representing worse disability

\*\* Measured on a 100 mm visual analogue scale, with 0 representing no pain and 100 the worst pain ever experienced

Values are means (SE) unless stated otherwise and are based on intention to treat, confidence interval [CI] assessed with repeated measurements analysis

1  
2  
3  
4  
5  
6  
7  
8  
9  
10  
11  
12  
13  
14  
15  
16  
17  
18  
19  
20  
21  
22  
23  
24  
25  
26  
27  
28  
29  
30  
31  
32  
33  
34  
35  
36  
37  
38  
39  
40  
41  
42  
43  
44  
45  
46  
47  
48  
49  
50  
51  
52  
53  
54  
55  
56  
57  
58  
59  
60

For peer review only

**Table 3: Primary and secondary outcome scores among patients treated for sciatica according to perceived recovery at five years**

| Outcome                                 | Disability* |                 | Leg pain†   |                  | Back pain†  |                   |
|-----------------------------------------|-------------|-----------------|-------------|------------------|-------------|-------------------|
|                                         | Mean (SD)   | Median (IQR)    | Mean (SD)   | Median (IQR)     | Mean (SD)   | Median (IQR)      |
| <b>Unsatisfactory recovery (n=49) ‡</b> | 11.3 (5.6)  | 11.0 (6.5-15.5) | 42.8 (27.9) | 46.0 (17.5-66.0) | 48.6 (49.5) | 49.5 (32.0-66.75) |
| <b>Satisfactory recovery (n=182) ‡</b>  | 1.3 (2.3)   | 0.0 (0.0-2.0)   | 6.5 (13.7)  | 1.0 (0.0-6.0)    | 10.2 (14.6) | 4.0 (0.0-15.0)    |

IQR=interquartile range

\* Roland disability questionnaire for sciatica

† measured on a 100 mm analogue scale

‡The 7-point Likert scale of global perceived recovery was dichotomised to satisfactory outcome (“complete” and “nearly complete” recovery) and unsatisfactory outcome (the other 5 scores ranging from “some recovery” to “severe worsening of complaints”).

**Table 4: Univariate and multivariate logistic analysis of predicting factors for unsatisfactory outcome of sciatica**

| Variable               | n   | Univariate analysis |           | p-value | Multivariate analysis |           | p-value |
|------------------------|-----|---------------------|-----------|---------|-----------------------|-----------|---------|
|                        |     | OR                  | 95% CI    |         | OR                    | 95% CI    |         |
| Randomization          |     |                     |           |         |                       |           |         |
| Surgery                | 115 | 0.96                | 0.51-1.80 | 0.899   |                       |           |         |
| Conservative           | 116 | 1.00                | -         |         |                       |           |         |
| Gender                 |     |                     |           |         |                       |           |         |
| Female                 | 75  | 1.27                | 0.66-2.46 | 0.472   |                       |           |         |
| Male                   | 156 | 1.00                | -         |         |                       |           |         |
| Age                    |     |                     |           |         |                       |           |         |
| >= 40                  | 137 | 2.22                | 1.11-4.47 | 0.023   | 2.36                  | 1.11-5.00 | 0.024   |
| < 40                   | 94  | 1.00                | -         |         |                       |           |         |
| Mentally demanding job |     |                     |           |         |                       |           |         |
| Yes                    | 139 | 1.17                | 0.57-2.37 | 0.669   |                       |           |         |
| No                     | 76  | 1.00                | -         |         |                       |           |         |

## Physical job

|     |    |      |           |       |
|-----|----|------|-----------|-------|
| Yes | 85 | 1.39 | 0.71-2.70 | 0.339 |
|-----|----|------|-----------|-------|

|    |     |      |   |  |
|----|-----|------|---|--|
| No | 132 | 1.00 | - |  |
|----|-----|------|---|--|

## Smoking

|     |    |      |           |       |
|-----|----|------|-----------|-------|
| Yes | 84 | 1.09 | 0.57-2.09 | 0.792 |
|-----|----|------|-----------|-------|

|    |     |      |   |  |
|----|-----|------|---|--|
| No | 142 | 1.00 | - |  |
|----|-----|------|---|--|

## BMI

|           |     |      |           |       |
|-----------|-----|------|-----------|-------|
| $\geq 25$ | 125 | 1.19 | 0.62-2.29 | 0.605 |
|-----------|-----|------|-----------|-------|

|        |     |      |   |  |
|--------|-----|------|---|--|
| $< 25$ | 101 | 1.00 | - |  |
|--------|-----|------|---|--|

## Sciatica provoked by

## sitting

|     |     |      |           |       |
|-----|-----|------|-----------|-------|
| Yes | 180 | 0.73 | 0.35-1.51 | 0.397 |
|-----|-----|------|-----------|-------|

|    |    |      |   |  |
|----|----|------|---|--|
| No | 51 | 1.00 | - |  |
|----|----|------|---|--|

## Coughing, sneezing

|     |     |      |           |       |
|-----|-----|------|-----------|-------|
| Yes | 163 | 1.06 | 0.53-2.12 | 0.881 |
|-----|-----|------|-----------|-------|

|    |    |      |   |  |
|----|----|------|---|--|
| No | 68 | 1.00 | - |  |
|----|----|------|---|--|

1  
2  
3  
4  
5  
6  
7  
8  
9  
10  
11  
12  
13  
14  
15  
16  
17  
18  
19  
20  
21  
22  
23  
24  
25  
26  
27  
28  
29  
30  
31  
32  
33  
34  
35  
36  
37  
38  
39  
40  
41  
42  
43  
44  
45  
46  
47  
48  
49

|                        |     |       |            |        |      |            |       |
|------------------------|-----|-------|------------|--------|------|------------|-------|
| Bragard's test         |     |       |            |        |      |            |       |
| Positive               | 62  | 1.91  | 0.97-3.74  | 0.059  |      |            |       |
| Negative               | 154 | 1.00  | -          |        |      |            |       |
| Sensory disturbance    |     |       |            |        |      |            |       |
| Yes                    | 200 | 1.45  | 0.47-4.47  | 0.514  |      |            |       |
| No                     | 24  | 1.00  | -          |        |      |            |       |
| VAS leg pain           |     |       |            |        |      |            |       |
| >= 70                  | 89  | 2.95  | 1.54-5.64  | 0.001  | 2.80 | 1.39-5.62  | 0.004 |
| < 70                   | 142 | 1.00  | -          |        |      |            |       |
| VAS back pain          |     |       |            |        |      |            |       |
| >= 70                  | 34  | 1.68  | 0.74-3.80  | 0.211  |      |            |       |
| < 70                   | 196 | 1.00  | -          |        |      |            |       |
| McGill affective score |     |       |            |        |      |            |       |
| High (3-5)             | 17  | 6.227 | 2.23-17.38 | <0.001 | 4.48 | 1.43-14.08 | 0.010 |
| Low (0-2)              | 209 | 1.00  | -          |        |      |            |       |
| MRI-level herniation   |     |       |            |        |      |            |       |



|                      |     |      |           |       |
|----------------------|-----|------|-----------|-------|
| L5S1                 | 125 | 0.69 | 0.37-1.31 | 0.256 |
| L3L4/L4L5            | 106 | 1.00 | -         |       |
| MRI-sequester        |     |      |           |       |
| Yes                  | 84  | 0.85 | 0.43-1.68 | 0.643 |
| No                   | 122 | 1.00 | -         |       |
| SF-36 Mental Health* |     |      |           |       |
| Impaired             | 66  | 2.25 | 1.16-4.35 | 0.014 |
| Not impaired         | 163 | 1.00 | -         |       |
| VAS General Health   |     |      |           |       |
| >= 70                | 60  | 1.36 | 0.68-2.74 | 0.382 |
| < 70                 | 168 | 1.00 | -         |       |

Only the numbers of the potential predictors with a  $p < 0.10$  in the univariate analysis were shown in the multivariate logistic regression.

\*The scores on the SF-36 Mental Health subscale were dichotomised using one standard deviation below the dutch reference population.

1  
2  
3  
4  
5  
6  
7  
8  
9  
10  
11  
12  
13  
14  
15  
16  
17  
18  
19  
20  
21  
22  
23  
24  
25  
26  
27  
28  
29  
30  
31  
32  
33  
34  
35  
36  
37  
38  
39  
40  
41  
42  
43  
44  
45  
46  
47  
48  
49  
50  
51  
52  
53  
54  
55  
56  
57  
58  
59  
60

## Surgery versus prolonged conservative treatment for sciatica: 5-year results of a randomised controlled trial

Michiel B. Lequin, MD, Dagmar Verbaan, PhD, Wilco C.H. Jacobs MSc, Ronald Brand, PhD, Gerrit J. Bouma, MD, PhD, William P. Vandertop, MD, PhD, Wilco C. Peul, MD, PhD, for the Leiden-The Hague Spine Intervention Prognostic Study Group

### Article Focus

- The sciatica trial, a randomised controlled trial, showed no significant differences after one and two years of follow-up in disability and pain between patients with severe sciatica for six to eight weeks, allocated for either early surgery or six months of prolonged conservative care
- 20% of all patients reported an unsatisfactory recovery after two years. In this study the five years' follow-up is described and predictors for unsatisfactory recovery are identified

### Key Messages

- 8% of all patients never showed any recovery
- In 23% of all patients sciatica results in ongoing complaints, which fluctuate over time, irrespective of treatment
- A strategy of prolonged conservative care with eventually delayed surgery gives a high chance of pain and disability to resolve, although 46% of these patients needed surgery after a few more months of prolonged suffering
- Age over 40 years, severe leg pain at baseline and a higher affective McGill pain score were predictors for an unsatisfactory recovery

### Strengths and Limitations

- Five years' follow-up results of a randomised controlled trial
- 18% of the patients were lost to follow-up at five years
- No difference in baseline characteristics between dropouts and patients providing the five years' data

## Introduction

The lumbosacral radicular syndrome (LSRS), caused by a herniated lumbar disc, is one of the most expensive disorders for society in terms of work absenteeism and disability<sup>21</sup>. In 2007, the Sciatica Trial showed that the clinical outcome after one year was not different from prolonged conservative treatment, although recovery within the first year was better with early surgery<sup>17</sup>. In the prolonged conservative treatment group however, 39% of patients crossed over to surgical treatment because of intractable pain within one year, and 44% within two years of follow-up<sup>16</sup>. Despite the fact that this study showed, along with other randomised controlled trials<sup>8, 23-25</sup>, that a strategy of prolonged conservative care is safe and reduces the risk for patients of undergoing surgery, the optimal timing of surgery with regard to long-term outcome has still not been defined.

Although LSRS is described in the literature as having a quite favourable course, one might question this assumption as the two years' follow-up showed that about twenty percent of patients report an unsatisfactory outcome on all outcome scales and that the risk to suffer prolonged disability is higher than expected beforehand<sup>16, 17</sup>.

The primary aim of the present study is to compare the pain and disability scores at five years' follow-up between patients in the Sciatica Trial randomised for surgery or randomised for prolonged conservative treatment. The second aim is to evaluate the proportion of patients with an unsatisfactory recovery at five years' follow-up and to identify factors contributing to these unsatisfactory results.

## Material and Methods

### Design

The study is part of the Sciatica Trial, a multicentre, prospective randomised trial among patients with 6 to 12 weeks of sciatica to determine whether a strategy of early surgery leads to better outcomes during the first year than does a strategy of

1  
2  
3 prolonged conservative treatment for an additional six months followed by surgery for  
4 those patients who do not improve.

5  
6 In summary, patients, 18-65 years of age, with an LSRS with a concomitant disc  
7 herniation confirmed by MRI, were eligible for participation. A computer-generated  
8 permuted-block scheme was used for randomisation stratified by centre. In the  
9 surgical intervention group, a disc herniation removal through a unilateral transflaval  
10 approach using optical magnification was performed. Prolonged conservative  
11 treatment regimen was defined by general practitioners and treatment was mainly  
12 aimed at resuming daily activities. Patients were notified beforehand that they were  
13 participating in a study comparing two different strategies for the timing of  
14 intervention rather than comparing surgery with non-surgical treatment.

15  
16 The design and study protocol have been published previously<sup>17, 18</sup>. Baseline  
17 characteristics from the Sciatica Trial have been published previously<sup>16, 17</sup> and were  
18 combined with the findings obtained from the five years' follow-up of the participants.  
19  
20  
21  
22  
23  
24  
25  
26

## 27 28 Procedures

29 As a standard procedure, the participants received the same study questionnaires as  
30 used for the one and two- year follow-up every year. At approximately five years after  
31 study inclusion, the participants were contacted once again by mail but now with an  
32 accompanied letter and asked to fill out the study questionnaires as used for the one  
33 and two-years' follow-up with extra questions about re-operations. Patients who did  
34 not respond initially, were contacted by telephone by a research nurse and asked  
35 once again to participate in the study by filling out the questionnaires. The additional  
36 5 years' assessment was approved by the local medical ethics committee.  
37  
38  
39  
40  
41  
42  
43

## 44 45 Primary and secondary outcomes

46 Primary outcome measures consisted of the Roland disability questionnaire (RDQ)  
47 for sciatica<sup>14</sup>, a 100 mm visual analogue scale (VAS) for leg pain<sup>4</sup>, and a seven-point  
48 Likert score of global perceived recovery. Higher RDQ and VAS scores were  
49 indicative of the experience of worse disability or greater intensity of pain,  
50 respectively. Global perceived recovery was measured with a 7-point Likert self-  
51 rating scale. Complete or almost complete disappearance of complaints (Likert  
52 scores 1-2) was defined as "satisfactory recovery", whereas Likert scores 3-7 were  
53 defined as "unsatisfactory recovery"<sup>17, 18</sup>.  
54  
55  
56  
57  
58  
59  
60

1  
2  
3 Secondary outcomes were a 100 mm VAS for back pain and the number of  
4 (re)operations for severe sciatica in the interval between two and five years. The  
5 number of (re)operations for severe sciatica was evaluated by asking patients  
6 whether there had been any new operations for severe sciatica in the interval  
7 between two and five years. Additionally, in all participating centres it was checked  
8 whether patients had had a treatment because of sciatica in the intervening period.  
9  
10  
11  
12  
13

#### 14 Potential prognostic factors

15 The prognostic value of demographic and clinical baseline variables for  
16 unsatisfactory recovery at five years was evaluated. The initial list of prognostic  
17 factors, chosen in advance by the investigators, was based on potential clinical  
18 importance, as indicated by earlier clinical results<sup>7, 15, 22</sup> The following potential  
19 prognostic demographic variables were included in the analysis: age (dichotomised  
20 <40/≥ 40), gender, smoking status, BMI (dichotomised <25/≥ 25), physical job  
21 (yes/no), or mentally demanding job (yes/no).  
22  
23  
24  
25  
26  
27

28 The following clinical baseline variables were included in the analysis: level of  
29 herniation at the MRI, the presence of a sequester on MRI (yes/no), sciatica  
30 provoked by sitting (yes/no), sciatica provoked by coughing/sneezing (yes/no),  
31 outcome of Bragard's test (positive/negative), sensory disturbance (yes/no).  
32 Furthermore, the following measurement instruments for general health, mental  
33 health, affective score and pain were included: the VAS scores for leg pain, back  
34 pain and general health, the Mental Health subscore of the Medical Outcomes Study  
35 36-Item Short-Form General Health Survey (SF-36)<sup>3</sup>, and the McGill affective  
36 score<sup>17</sup>. The VAS score range from 0-100, with higher scores indicating more severe  
37 symptoms. For this analysis, dichotomised VAS scores were used (<70/≥70), as  
38 described in an earlier study<sup>17</sup>. The SF-36 Mental Health score ranges from 0 to 100,  
39 with higher scores indicating less severe symptoms. For this analysis, dichotomised  
40 SF-36 Mental Health subscores were used (scores below one standard deviation of  
41 the dutch reference population<sup>1</sup> were defined as impaired). The McGill affective score  
42 measures the qualitative perception of pain by the patient and ranges from 0-5 where  
43 a high score (3-5) is correlated with a more depressed and anxious mood. For this  
44 analysis, dichotomised McGill affective scores were used (<3/≥3)<sup>17</sup>.  
45  
46  
47  
48  
49  
50  
51  
52  
53  
54  
55  
56  
57

#### 58 **Statistical analysis**

1  
2  
3 The original sample size calculation was based on a difference in RDQ outcome  
4 during and in a different speed to recovery during the first year. The main endpoint  
5 “recovery” is in principle time-dependent in the sense that it reflects the situation of a  
6 patient at a particular moment in time and the situation may also deteriorate  
7 afterwards, so it can change from recovered to non-recovered and back to recovered  
8 again, therefore actually being a time-varying dichotomous outcome which should be  
9 taken into account when interpreting the results of the analyses. Differences between  
10 randomisation groups at baseline and after five years of follow-up were assessed by  
11 comparing means, medians, or percentages, depending on the type of variable.  
12 Baseline values of variables were used as covariates in the main analyses whenever  
13 appropriate to adjust for possible differences between the randomised groups and to  
14 increase the power of the analyses. Outcomes of function and pain over the entire  
15 follow-up period were analysed using a repeated measurements analysis of variance  
16 with a first order autoregressive covariance matrix. Estimated consecutive scores  
17 were expressed as means and 95% confidence intervals. Pointwise estimates were  
18 obtained using models with time as a categorical covariate to allow assessment of  
19 systematic patterns. Differences between groups in the dichotomised Likert score at  
20 five years were evaluated with Fisher’s exact test (randomisation group) or Mann-  
21 Whitney U (disability and pain scores).  
22 The analyses were done according the intention-to-treat principle, except the  
23 comparison of groups with a satisfactory or unsatisfactory recovery.  
24 Univariate and multivariate analyses were performed to evaluate the prognostic value  
25 of baseline variables for an unsatisfactory outcome at five years. The results are  
26 presented as odds ratios (ORs) with 95% confidence intervals (CIs). Chi-square tests  
27 were used to perform the univariate analyses. Potential predictors with a  $p < 0.10$  in  
28 the univariate analysis were included in the multivariate logistic regression. The  
29 multivariate logistic regression model was performed in a backward approach and  
30 included randomisation group irrespective of its significance in the univariate  
31 analysis, to control for its influence on the dependent variable.  
32 For all other analyses,  $p < 0.05$  was considered significant. Data collection and quality  
33 checks were performed with the ProMISe web-based secure data management  
34 system of the Department of Medical Statistics and Bioinformatics of Leiden  
35 University Medical Centre. For all statistical analyses, SPSS version 18.0 was used.  
36  
37  
38  
39  
40  
41  
42  
43  
44  
45  
46  
47  
48  
49  
50  
51  
52  
53  
54  
55  
56  
57  
58  
59  
60

## Results

Fifty-two of the 283 patients (18%) were lost to follow-up, among them one patient who died after a cardiac bypass operation and 19 patients who refused to participate. The baseline characteristics age, gender, BMI, randomization group, RDQ, and VAS-scores were not significantly different between the dropouts and those patients providing the five years' follow-up data. Twenty-six of the dropouts were randomised for early surgery. Among the 26 dropouts in the prolonged conservative group, 11 (42%) had surgery for sciatica during follow-up.

At five years' follow-up, 66 of the 142 patients (46%) assigned to conservative treatment had had surgery because of intractable sciatica (table 1). Within the first year this was 55 (39%) and after two years 62 (44%). Of the 141 patients allocated for early surgery, 16 (11%) recovered before surgery and were not operated on during the five years of follow-up. Within this five years' period, nine patients (7%) in the early surgery group and eight of the conservatively allocated patients who had surgery (12%), needed recurrent disc surgery. Three patients in the conservative group needed two re-operations or more (table 1).

**The primary and secondary outcome scores** concerning disability, leg pain and back pain at five years were slightly higher in the early surgery group compared to the prolonged conservative group, however, there were no significant differences (table 2, fig 1a-c).

In the total group, after five years, 49 (21%) patients still had an unsatisfactory recovery, defined as not having a complete or almost complete recovery on the dichotomised Likert scale, irrespective of their allocated treatment group (25 patients in the prolonged conservative group, 24 patients in the early surgery group,  $p=1.00$ ). Patients with an unsatisfactory recovery had a significantly higher amount of leg pain, back pain and disability (all  $p$ -values  $<0.01$ ) compared to the group with a satisfactory recovery (table 3). At five years' follow-up, 93 patients (62 men and 31 women, mean age 43.7, SD 9.8) had not had surgery (76 from the conservative group and 16 from the early surgery group) and the percentage recovered (77%) or not-recovered at five years (23%) was not different from the total group.

In the period of five years, 66 of the 213 patients (31%) with collected data at one, two and five years of follow-up had at least one period of unsatisfactory recovery. The pattern of recovery showed 16 patients who did not report any recovery at one, two and five years of follow-up. Twenty-four patients switched from 'not recovered' in

1  
2  
3 the first or second year to 'recovered' at the five-years' analysis. Sixteen of these  
4 patients were from the prolonged conservative group. Six of these patients needed  
5 an operation of whom four needed a re-operation before they recovered, compared  
6 to two of the eight patients in the early surgery group needing a re-operation. Twenty-  
7 six patients showed a good recovery at one and/or two years but not at five years of  
8 follow-up (fig 2).  
9

10  
11  
12 Univariate logistic regression evaluating the relationship between possible prognostic  
13 variables and unsatisfactory recovery at five years, irrespective of intermediate  
14 recovery, showed that a high McGill affective score (score > 3; OR 6.23 (95% CI:  
15 2.23-17.38)) was a significant predictor, as were severe leg pain at baseline (VAS >  
16 70; OR 2.95 (95% CI: 1.54-5.64), an impaired score on the SF-36 Mental Health  
17 subscale (OR 2.25 (95% CI: 1.16-4.35)), higher age (age > 40; OR 2.22 (95% CI:  
18 1.11-4.47)), and a positive Bragard test (OR 1.91(95% CI: 0.97-3.74)) (table 4). The  
19 multivariate analysis included all variables that were related to unsatisfactory  
20 outcome in the univariate analysis ( $p < 0.10$ ), as well as randomisation group. This  
21 analysis showed that a high McGill affective score (score > 3; OR: 4.48 (95% CI:  
22 1.43-14.08)), severity of leg pain (VAS > 70; OR: 2.80 (95% CI: 1.39-5.62)), and age  
23 (age > 40 years; OR: 2.36 (95% CI: 1.12-5.00)) were the only significant predictors  
24 for an unsatisfactory outcome at five years.  
25  
26  
27  
28  
29  
30  
31  
32  
33  
34  
35

## 36 Discussion

37  
38 This long-term follow-up study of the same patient cohort corroborates with earlier 1  
39 and 2 year results as no significant differences between randomisation groups in  
40 disability, leg pain or back pain are found after five years of follow-up<sup>16, 17</sup>. Eighteen  
41 percent of the initial cohort of 283 patients was lost to follow-up after five years. This  
42 reduced the power of our latest analysis to some extent. However, the baseline  
43 characteristics showed no differences between the included group and the dropouts.  
44  
45 The allocated strategy of an extra six months of wait-and-see resulted in a large  
46 proportion of delayed surgical treatment (46%) for persistent intense leg pain causing  
47 severe disability, despite all kinds of conservative treatment. This means that patients  
48 should be informed that prolonged conservative care gives them quite a high chance  
49 for resolution of pain and disability without the need of a surgical intervention, but that  
50 this strategy also carries a fair chance (46%) that this waiting for the pain to resolve  
51 will still end with them needing disc surgery.  
52  
53  
54  
55  
56  
57  
58  
59  
60



1  
2  
3 The question however, is whether this conclusion is completely accurate. The design  
4 of the original study was a comparison of early surgery versus prolonged  
5 conservative care for six months, after which surgery was offered when there still  
6 were severe complaints. This means that we do not know the precise percentage of  
7 patients who would have become pain free with even longer conservative care,  
8 because the majority of these patients was operated on after six months. But on the  
9 other hand one might question whether such a proposed long conservative regimen  
10 is in proportion with the small risk of a surgical intervention, which provides a better  
11 outcome in the first six months, rather than being disabled in daily life during this long  
12 period of conservative care. Furthermore, the proportion of patients who were not  
13 operated after five years with a satisfactory or unsatisfactory recovery was the same  
14 as in the total population, showing that also in the non-operated patients there was a  
15 rather high amount of unsatisfactory recovery.

16  
17  
18  
19  
20  
21  
22  
23  
24  
25  
26  
27  
28  
29  
30  
31  
32  
33  
34  
35  
36  
37  
38  
39  
40  
41  
42  
43  
44  
45  
46  
47  
48  
49  
50  
51  
52  
53  
54  
55  
56  
57  
58  
59  
60  
Twenty-one percent of patients experienced unsatisfactory recovery at five years,  
while 31% of the patients with complete data at one, two and five years of follow-up  
noted at least once an unsatisfactory recovery during this five years' follow-up period,  
irrespective of their allocated group. So the optimal timing of surgery is still on  
debate, as is the question which patients would benefit from surgery and which from  
prolonged conservative care.

The study design of this five year analysis did not permit us to look properly for the  
causes of an unsatisfactory recovery. A shortcoming of this study is the fact that  
there was no permission in the present study to retrieve new MR-images, but a  
recent study with the same patient population did not show any correlation between  
MR-images and satisfactory or unsatisfactory recovery at one year<sup>5</sup>.

The patterns of recovery show that 8% of all patients with collected data, had never  
had any recovery during the follow-up period, showing that there are not that many  
non-responders of conservative or surgical treatment. The other 50 patients (23%)  
with an unsatisfactory recovery showed a switch over time from recovered to not-  
recovered, or vice versa. This is in line with the idea that sciatica is caused by  
chronic disc disease with intermittent nerve compression or inflammation and that  
pain can thus re-occur despite any earlier treatment<sup>10, 13</sup>. In the 24 patients who  
switched from 'not-recovered' in the first or second year to 'recovered' at the five-  
years' analysis, there was a higher amount of patients who needed a re-operation  
before recovery occurred in the prolonged conservative group compared to the early

1  
2  
3 surgery group. This may be caused by less effectiveness of late surgery, although  
4 this could not be proven. This less effectiveness of late surgery compared to early  
5 surgery could be caused by more chronic changes around the disc protrusion or  
6 sequester, causing more difficulty in freeing the nerve from compression.  
7  
8

9  
10 In our study we could not estimate the effect of early versus late surgery, or surgery  
11 versus conservative treatment in an unbiased way since that would require a per  
12 protocol analysis. This would ignore the randomised allocation and compare patients  
13 who by definition would be incomparable since the design of our study did not  
14 envisage a randomisation between early and late surgery but merely allowed for the  
15 time of surgery being determined by the assessment of both patient and physician  
16 after initial randomisation. The impossibility to capture completely the condition of the  
17 patient and the selection mechanism which leads to the decision to operate, or not, at  
18 any given point in (follow-up) time, renders any multivariate analysis that attempts to  
19 make the groups of early and late operations comparable, biased. This bias has  
20 occurred in other randomised studies where this “per protocol” analysis was used  
21 and patients who were operated on after a prolonged duration of symptoms from a  
22 herniated lumbar disk have been shown to have a worse outcome than patients who  
23 were operated on relatively early<sup>9, 11, 12, 20</sup>. As a consequence of this “per protocol  
24 analysis both groups differed in baseline characteristics such as type of disc  
25 herniation, neurological deficit and reported depression, rendering comparison of  
26 both groups fallacious<sup>20</sup>.  
27

28  
29 In this five-years’ analysis the independent prognostic factors for an unsatisfactory  
30 outcome were a high McGill affective score, a high amount of leg pain, and age over  
31 40 years at baseline. A high McGill affective score correlates with a more depressed  
32 and anxious mood<sup>17</sup>, and mental stress, depression or other psychological factors  
33 have been widely described as risk factors for development of chronic pain<sup>19</sup>.  
34

35  
36 Although a high amount of pain at baseline can also be caused by psychological  
37 factors, it is an independent prognostic factor for an unsatisfactory outcome in this  
38 study. Perhaps the severity of nerve root compression at intake predicts the overall  
39 outcome, but a correlation between amount of pain and amount of root compression  
40 has not been proven<sup>1</sup>. In our study, other factors concerning the severity of nerve  
41 root damage, such as severe sensibility disturbance, showed no association. In a  
42 systematic review of non-surgically treated sciatica none of the three studies that  
43 investigated baseline leg pain severity showed a clear prognostic influence on  
44  
45  
46  
47  
48  
49  
50  
51  
52  
53  
54  
55  
56  
57  
58  
59  
60

1  
2  
3 outcome. Age was also not found to be a prognostic factor in six out of seven  
4 studies<sup>2</sup>. The reason for age over 40 years being a prognostic indicator for a  
5 unsatisfactory outcome could be because disc herniation is part of a degenerative  
6 disease which seems to worsen in time. A study of prognostic factors for  
7 unsatisfactory recovery among operated and unoperated patients did not show leg  
8 pain severity and age to be a prognostic factor, but found the variables severe back  
9 pain and male gender as predictors for a bad outcome at the one year follow-up<sup>2, 6</sup>.  
10 This was in contrast with our one year study where being female was a prognostic  
11 factor for a bad outcome, but in this five years' analysis this also disappeared. The  
12 possible prognostic role of gender might be over-estimated in the past.  
13  
14  
15  
16  
17  
18  
19  
20  
21  
22

## 23 Conclusion

24 After five years of follow-up there were still no differences in pain and disability  
25 between the patients randomised for early surgery or prolonged conservative care.  
26  
27

28 Signs of pain quality associated with depression and a more anxious mood, the age  
29 of the patient and the severity of leg pain at baseline were predictive of an  
30 unsatisfactory outcome.  
31  
32  
33

34 In general, patients must be informed that prolonged conservative care might give  
35 them a fair chance for pain and disability to resolve without surgery, but with the risk  
36 for delayed surgery in the end after a prolonged period of suffering from sciatica.  
37  
38  
39

40 Furthermore, although the total number of disabled patients without pain free periods  
41 in this study seems to be low, in almost one fourth of the patients, sciatica appears to  
42 be an ongoing disease with variable complaints in time, irrespective of treatment.  
43 These patients need our full attention, and further investigation at 10 years' follow-up  
44 is being planned, because this patient category has the highest burden on society  
45 concerning work absenteeism and general health costs.  
46  
47  
48  
49  
50  
51

52 Extra data is available by emailing the first author.  
53  
54  
55  
56  
57  
58  
59  
60

- 1  
2  
3  
4  
5  
6  
7  
8  
9 • Contributors: The participants in the Leiden-The Hague Spine Intervention Prognostic  
10 Study Group were: protocol committee, WCP, BWK, and RTWMT; steering  
11 committee, BWK, RTWMT, JAH Eekhof, JTJ Tans, WBvdH, WCP, RB, and HC van  
12 Houwelingen; statistical analysis, WBvdH; research nurses and data collection and  
13 management, M Nuyten, P Bergman, G Holtkamp, S Dukker, A Mast, L Smakman, C  
14 Waanders, L Polak, A Nieborg; coordinating physicians of participating hospitals, JTJ  
15 Tans, R Walchenbach (Medical Center Haaglanden, The Hague), J van Rossum, P  
16 Schutte, RTWMT (Diaconessen Hospital, Leiden), GAM Verheul, JE Dalman, JAL  
17 Wurzer (Groene Hart Hospital, Gouda), JWA Sven, A Kloet (Reinier de Graaf  
18 Hospital, Delft/Voorburg), ISJ Merkies, H van Dulken (Spaarne Hospital,  
19 Heemstede/Haarlem), PCLA Lambrechts, JAL Wurzer (Bronovo Hospital, The  
20 Hague), RWM Keunen, CFE Hoffmann (Haga Hospital, The Hague), J Haan, H van  
21 Dulken (Rijnland Hospital, Leiderdorp/Alphen ad Rijn), R Groen, RRF Kuiters (Lange  
22 Land Hospital, Zoetermeer), RAC Roos, JHC Voormolen (Leiden University Medical  
23 Center, Leiden), JAH Eekhof (Public Health and Primary Care, Leiden University,  
24 Leiden). WCP is guarantor for the study.  
25  
26  
27  
28  
29  
30  
31  
32  
33  
34  
35  
36  
37  
38  
39  
40  
41  
42  
43  
44  
45  
46  
47  
48  
49  
50  
51  
52  
53  
54  
55  
56  
57  
58  
59  
60

#### Reference List

1. Aaronson NK, Muller M, Cohen PD, et al: Translation, validation, and norming of the Dutch language version of the SF-36 Health Survey in community and chronic disease populations. **J Clin Epidemiol** 51:1055-1068, 1998
2. Ashworth J, Konstantinou K, Dunn KM: Prognostic factors in non-surgically treated sciatica: a systematic review. **BMC Musculoskelet Disord** 12:208, 2011
3. Brazier JE, Harper R, Jones NM, et al: Validating the SF-36 health survey questionnaire: new outcome measure for primary care. **BMJ** 305:160-164, 1992

- 1  
2  
3 4. Collins SL, Moore RA, McQuay HJ: The visual analogue pain intensity scale: what is  
4 moderate pain in millimetres? **Pain** **72**:95-97, 1997  
5  
6  
7
- 8 5. el BA, Vleggeert-Lankamp CL, Nijeholt GJ, et al: Magnetic resonance imaging in  
9 follow-up assessment of sciatica. **N Engl J Med** **368**:999-1007, 2013  
10  
11  
12
- 13 6. Haugen AJ, Brox JI, Grovle L, et al: Prognostic factors for non-success in patients with  
14 sciatica and disc herniation. **BMC Musculoskelet Disord** **13**:183, 2012  
15  
16  
17
- 18 7. Hurme M, Alaranta H: Factors predicting the result of surgery for lumbar intervertebral  
19 disc herniation. **Spine (Phila Pa 1976)** **12**:933-938, 1987  
20  
21  
22
- 23 8. Jacobs WC, van TM, Arts M, et al: Surgery versus conservative management of sciatica  
24 due to a lumbar herniated disc: a systematic review. **Eur Spine J** **20**:513-522, 2011  
25  
26  
27
- 28 9. Jonsson B: Patient-related factors predicting the outcome of decompressive surgery.  
29 **Acta Orthop Scand Suppl** **251**:69-70, 1993  
30  
31  
32
- 33 10. Mulleman D, Mammou S, Griffoul I, et al: Pathophysiology of disk-related sciatica. I.--  
34 Evidence supporting a chemical component. **Joint Bone Spine** **73**:151-158, 2006  
35  
36  
37
- 38 11. Ng LC, Sell P: Predictive value of the duration of sciatica for lumbar discectomy. A  
39 prospective cohort study. **J Bone Joint Surg Br** **86**:546-549, 2004  
40  
41  
42
- 43 12. Nygaard OP, Kloster R, Solberg T: Duration of leg pain as a predictor of outcome after  
44 surgery for lumbar disc herniation: a prospective cohort study with 1-year follow up.[see  
45 comment]. **J Neurosurg Pediatrics** **92**:131-134, 2000  
46  
47  
48  
49  
50  
51  
52
- 53 13. Omarker K, Myers RR: Pathogenesis of sciatic pain: role of herniated nucleus pulposus  
54 and deformation of spinal nerve root and dorsal root ganglion. **Pain** **78**:99-105, 1998  
55  
56  
57  
58  
59  
60

- 1  
2  
3 14. Patrick DL, Deyo RA, Atlas SJ, et al: Assessing health-related quality of life in patients  
4  
5 with sciatica. **Spine (Phila Pa 1976 ) 20**:1899-1908, 1995  
6  
7
- 8 15. Peul WC, Brand R, Thomeer RT, et al: Influence of gender and other prognostic factors  
9  
10 on outcome of sciatica. **Pain 138**:180-191, 2008  
11  
12
- 13 16. Peul WC, van den Hout WB, Brand R, et al: Prolonged conservative care versus early  
14  
15 surgery in patients with sciatica caused by lumbar disc herniation: two year results of a  
16  
17 randomised controlled trial. **BMJ 336**:1355-1358, 2008  
18  
19
- 20 21. Peul WC, Van Houwelingen HC, van den Hout WB, et al: Surgery versus prolonged  
22  
23 conservative treatment for sciatica. **N Engl J Med 356**:2245-2256, 2007  
24  
25
- 26 26. Peul WC, Van Houwelingen HC, van der Hout WB, et al: Prolonged conservative  
27  
28 treatment or 'early' surgery in sciatica caused by a lumbar disc herniation: rationale and  
29  
30 design of a randomized trial [ISRCT 26872154]. **BMC Musculoskelet Disord 6**:8,  
31  
32 2005  
33  
34
- 35 36. Pincus T, Burton AK, Vogel S, et al: A systematic review of psychological factors as  
37  
38 predictors of chronicity/disability in prospective cohorts of low back pain. **Spine (Phila**  
39  
40 **Pa 1976 ) 27**:E109-E120, 2002  
41  
42
- 43 44. Rihn JA, Hilibrand AS, Radcliff K, et al: Duration of symptoms resulting from lumbar  
45  
46 disc herniation: effect on treatment outcomes: analysis of the Spine Patient Outcomes  
47  
48 Research Trial (SPORT). **J Bone Joint Surg Am 93**:1906-1914, 2011  
49  
50
- 51 52. van Tulder MW, Koes BW, Bouter LM: A cost-of-illness study of back pain in The  
53  
54 Netherlands. **Pain 62**:233-240, 1995  
55  
56  
57  
58  
59  
60

- 1  
2  
3 22. Vroomen PC, de Krom MC, Knottnerus JA: Predicting the outcome of sciatica at short-  
4 term follow-up. **Br J Gen Pract** 52:119-123, 2002  
5  
6  
7  
8 23. Weinstein JN, Lurie JD, Tosteson TD, et al: Surgical vs nonoperative treatment for  
9 lumbar disk herniation: the Spine Patient Outcomes Research Trial (SPORT)  
10 observational cohort. **JAMA** 296:2451-2459, 2006  
11  
12  
13  
14 24. Weinstein JN, Lurie JD, Tosteson TD, et al: Surgical versus nonoperative treatment for  
15 lumbar disc herniation: four-year results for the Spine Patient Outcomes Research Trial  
16 (SPORT). **Spine (Phila Pa 1976)** 33:2789-2800, 2008  
17  
18  
19  
20 25. Weinstein JN, Tosteson TD, Lurie JD, et al: Surgical vs nonoperative treatment for  
21 lumbar disk herniation: the Spine Patient Outcomes Research Trial (SPORT): a  
22 randomized trial. **JAMA** 296:2441-2450, 2006  
23  
24  
25  
26  
27  
28  
29  
30  
31  
32  
33  
34  
35  
36  
37  
38  
39  
40  
41  
42  
43  
44  
45  
46  
47  
48  
49  
50  
51  
52  
53  
54  
55  
56  
57  
58  
59  
60

Figure 1a.

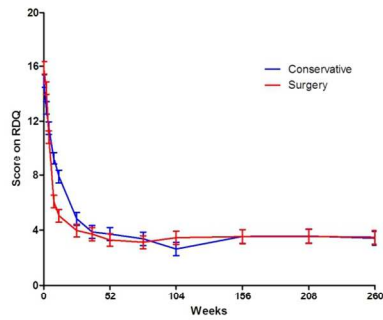

1b.

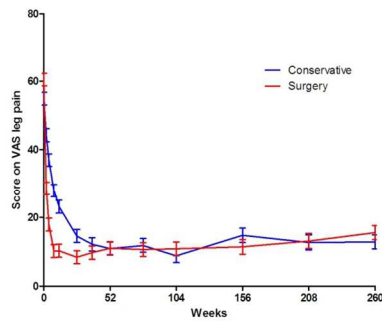

1c.

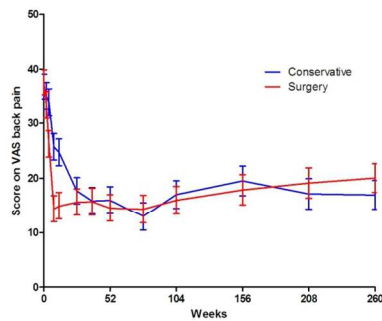

Fig 1a-c: Repeated measurement analysis curves of mean scores for Roland disability questionnaire (top panel) and visual analogue scales for leg pain and back pain (lower panels).  
90x146mm (300 x 300 DPI)



1  
2  
3  
4  
5  
6  
7  
8  
9  
10  
11  
12  
13  
14  
15  
16  
17  
18  
19  
20  
21  
22  
23  
24  
25  
26  
27  
28  
29  
30  
31  
32  
33  
34  
35  
36  
37  
38  
39  
40  
41  
42  
43  
44  
45  
46  
47  
48  
49  
50  
51  
52  
53  
54  
55  
56  
57  
58  
59  
60

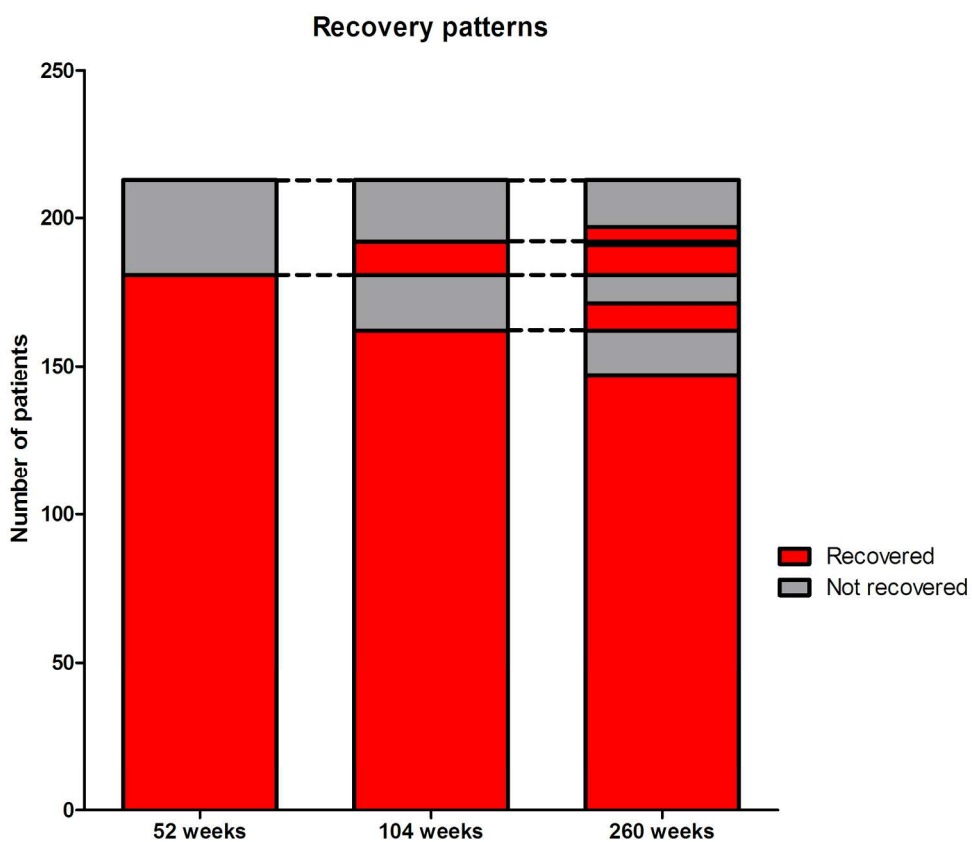

Fig 2 patterns of recovery between results of the one, two and five years' analysis with a dichotomized Likert score for perceived recovery.  
182x158mm (300 x 300 DPI)

only

## CONSORT 2010 Flow Diagram

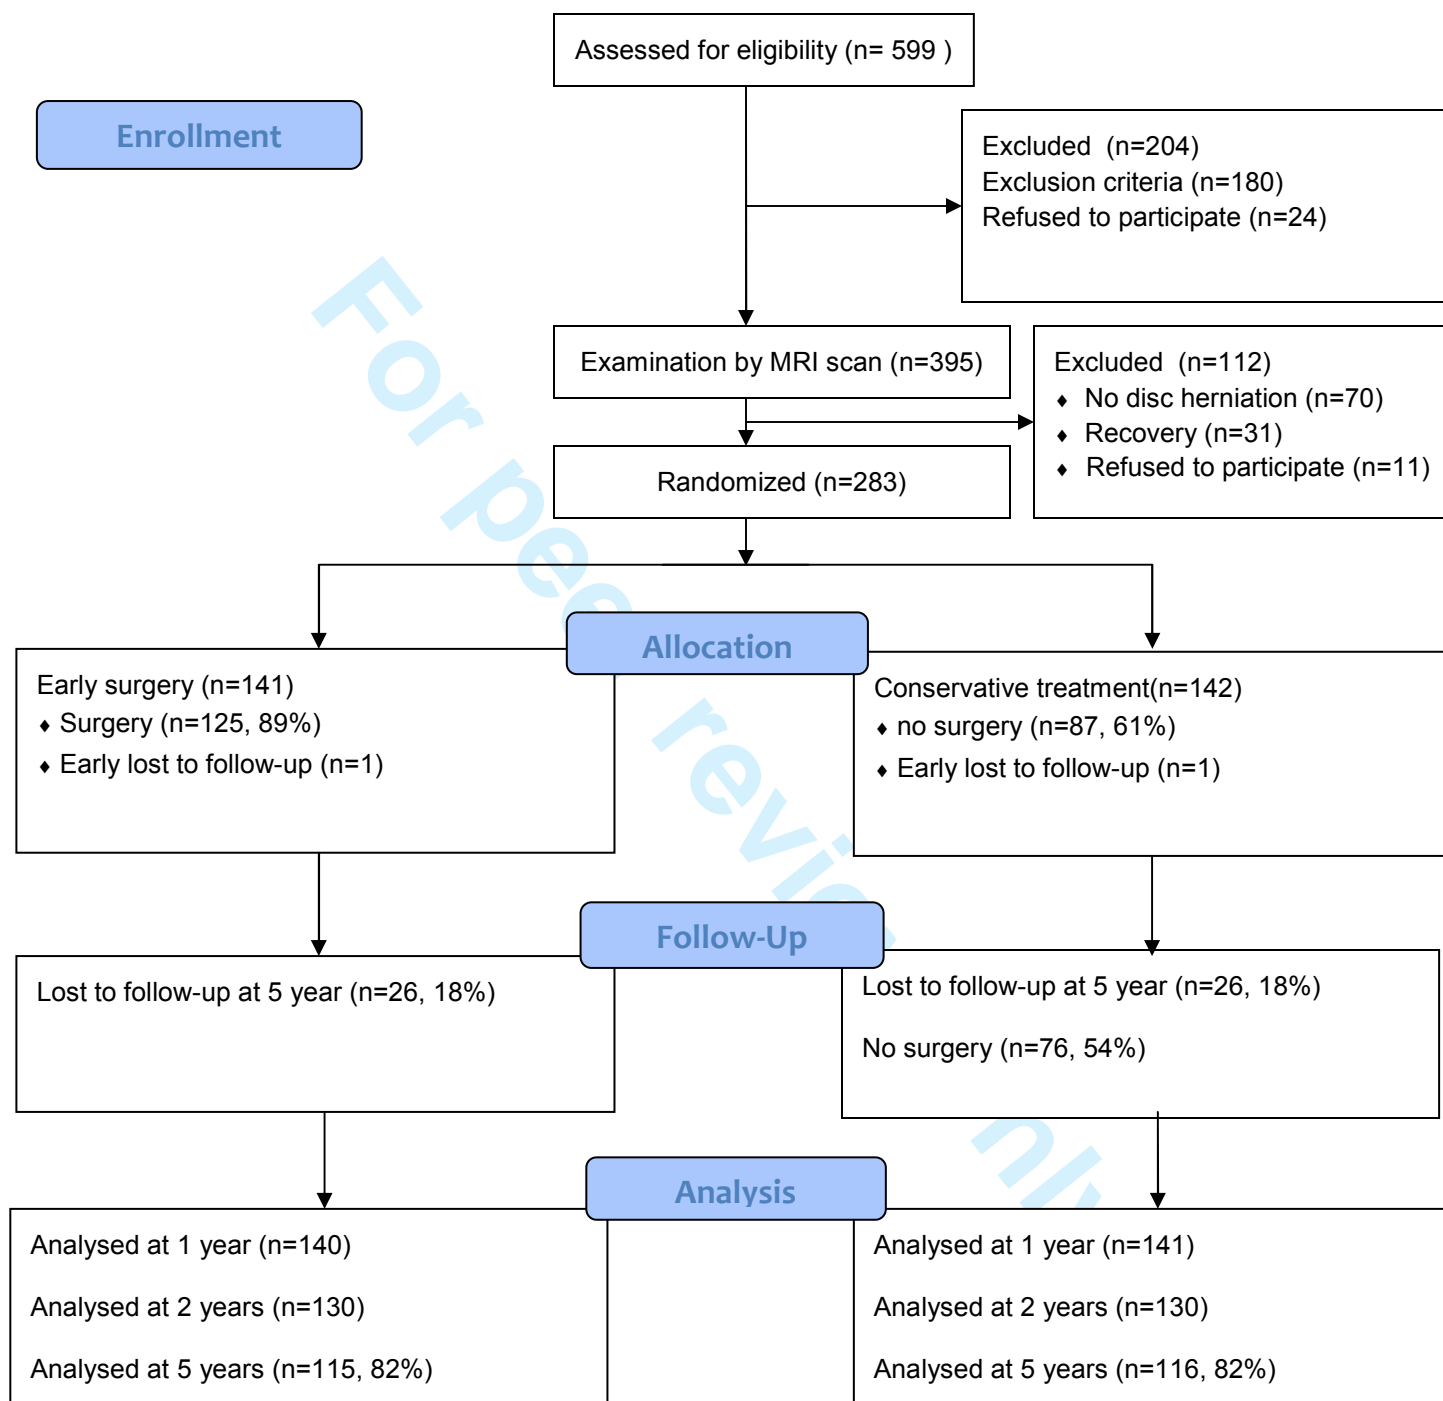

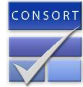

## CONSORT 2010 checklist of information to include when reporting a randomised trial\*

| Section/Topic             | Item No | Checklist item                                                                                                                        | Reported on page No                                                                                       |
|---------------------------|---------|---------------------------------------------------------------------------------------------------------------------------------------|-----------------------------------------------------------------------------------------------------------|
| <b>Title and abstract</b> |         |                                                                                                                                       |                                                                                                           |
|                           | 1a      | Identification as a randomised trial in the title                                                                                     | 1                                                                                                         |
|                           | 1b      | Structured summary of trial design, methods, results, and conclusions (for specific guidance see CONSORT for abstracts)               | 1                                                                                                         |
| <b>Introduction</b>       |         |                                                                                                                                       |                                                                                                           |
| Background and objectives | 2a      | Scientific background and explanation of rationale                                                                                    | 2                                                                                                         |
|                           | 2b      | Specific objectives or hypotheses                                                                                                     | 2                                                                                                         |
| <b>Methods</b>            |         |                                                                                                                                       |                                                                                                           |
| Trial design              | 3a      | Description of trial design (such as parallel, factorial) including allocation ratio                                                  | 3                                                                                                         |
|                           | 3b      | Important changes to methods after trial commencement (such as eligibility criteria), with reasons                                    |                                                                                                           |
| Participants              | 4a      | Eligibility criteria for participants                                                                                                 | 3                                                                                                         |
|                           | 4b      | Settings and locations where the data were collected                                                                                  | 3                                                                                                         |
| Interventions             | 5       | The interventions for each group with sufficient details to allow replication, including how and when they were actually administered | 3                                                                                                         |
| Outcomes                  | 6a      | Completely defined pre-specified primary and secondary outcome measures, including how and when they were assessed                    | 4                                                                                                         |
|                           | 6b      | Any changes to trial outcomes after the trial commenced, with reasons                                                                 |                                                                                                           |
| Sample size               | 7a      | How sample size was determined                                                                                                        | See previous article <b>BMJ</b> . 2008 Jun 14;336(7657): 1355-8. doi: 10.1136/bmj.a143. Epub 2008 May 23. |
|                           | 7b      | When applicable, explanation of any interim analyses and stopping guidelines                                                          | Non applicable                                                                                            |

|    |                     |     |                                                                                                                                                   |
|----|---------------------|-----|---------------------------------------------------------------------------------------------------------------------------------------------------|
| 1  |                     |     |                                                                                                                                                   |
| 2  | Randomisation:      |     |                                                                                                                                                   |
| 3  | Sequence            | 8a  | Method used to generate the random allocation sequence                                                                                            |
| 4  | generation          |     | See the<br>remark above                                                                                                                           |
| 5  |                     |     |                                                                                                                                                   |
| 6  |                     | 8b  | Type of randomisation; details of any restriction (such as blocking and block size)                                                               |
| 7  | Allocation          | 9   | Mechanism used to implement the random allocation sequence (such as sequentially numbered containers),                                            |
| 8  | concealment         |     | describing any steps taken to conceal the sequence until interventions were assigned                                                              |
| 9  | mechanism           |     |                                                                                                                                                   |
| 10 | Implementation      | 10  | Who generated the random allocation sequence, who enrolled participants, and who assigned participants to interventions                           |
| 11 |                     |     |                                                                                                                                                   |
| 12 | Blinding            | 11a | If done, who was blinded after assignment to interventions (for example, participants, care providers, those assessing outcomes) and how          |
| 13 |                     |     |                                                                                                                                                   |
| 14 |                     | 11b | If relevant, description of the similarity of interventions                                                                                       |
| 15 |                     |     |                                                                                                                                                   |
| 16 | Statistical methods | 12a | Statistical methods used to compare groups for primary and secondary outcomes                                                                     |
| 17 |                     | 12b | Methods for additional analyses, such as subgroup analyses and adjusted analyses                                                                  |
| 18 |                     |     | 5                                                                                                                                                 |
| 19 |                     |     | 5 plus 6                                                                                                                                          |
| 20 | <b>Results</b>      |     |                                                                                                                                                   |
| 21 | Participant flow (a | 13a | For each group, the numbers of participants who were randomly assigned, received intended treatment, and                                          |
| 22 | diagram is strongly |     | were analysed for the primary outcome                                                                                                             |
| 23 | recommended)        | 13b | For each group, losses and exclusions after randomisation, together with reasons                                                                  |
| 24 | Recruitment         | 14a | Dates defining the periods of recruitment and follow-up                                                                                           |
| 25 |                     | 14b | Why the trial ended or was stopped                                                                                                                |
| 26 | Baseline data       | 15  | A table showing baseline demographic and clinical characteristics for each group                                                                  |
| 27 |                     |     | Included<br>table1                                                                                                                                |
| 28 |                     |     |                                                                                                                                                   |
| 29 | Numbers analysed    | 16  | For each group, number of participants (denominator) included in each analysis and whether the analysis was by original assigned groups           |
| 30 |                     |     | Table 1                                                                                                                                           |
| 31 | Outcomes and        | 17a | For each primary and secondary outcome, results for each group, and the estimated effect size and its precision (such as 95% confidence interval) |
| 32 | estimation          |     | Table 2                                                                                                                                           |
| 33 |                     | 17b | For binary outcomes, presentation of both absolute and relative effect sizes is recommended                                                       |
| 34 | Ancillary analyses  | 18  | Results of any other analyses performed, including subgroup analyses and adjusted analyses, distinguishing pre-specified from exploratory         |
| 35 |                     |     | Page 6 and 7                                                                                                                                      |
| 36 | Harms               | 19  | All important harms or unintended effects in each group (for specific guidance see CONSORT for harms)                                             |
| 37 |                     |     | none                                                                                                                                              |
| 38 | <b>Discussion</b>   |     |                                                                                                                                                   |
| 39 | Limitations         | 20  | Trial limitations, addressing sources of potential bias, imprecision, and, if relevant, multiplicity of analyses                                  |
| 40 | Generalisability    | 21  | Generalisability (external validity, applicability) of the trial findings                                                                         |
| 41 |                     |     | Page 7-10                                                                                                                                         |
| 42 |                     |     | 7-10                                                                                                                                              |

|    |                          |    |                                                                                                               |                               |
|----|--------------------------|----|---------------------------------------------------------------------------------------------------------------|-------------------------------|
| 1  |                          |    |                                                                                                               |                               |
| 2  | Interpretation           | 22 | Interpretation consistent with results, balancing benefits and harms, and considering other relevant evidence | yes                           |
| 3  |                          |    |                                                                                                               |                               |
| 4  | <b>Other information</b> |    |                                                                                                               |                               |
| 5  | Registration             | 23 | Registration number and name of trial registry                                                                | In the abstract               |
| 6  | Protocol                 | 24 | Where the full trial protocol can be accessed, if available                                                   | <a href="#">BMC</a>           |
| 7  |                          |    |                                                                                                               | <a href="#">Musculoskelet</a> |
| 8  |                          |    |                                                                                                               | <a href="#">Disord.</a> 2005  |
| 9  |                          |    |                                                                                                               | Feb 11;6:8.                   |
| 10 |                          |    |                                                                                                               |                               |
| 11 |                          |    |                                                                                                               |                               |
| 12 | Funding                  | 25 | Sources of funding and other support (such as supply of drugs), role of funders                               | none                          |
| 13 |                          |    |                                                                                                               |                               |
| 14 |                          |    |                                                                                                               |                               |

15 \*We strongly recommend reading this statement in conjunction with the CONSORT 2010 Explanation and Elaboration for important clarifications on all the items. If relevant, we also  
 16 recommend reading CONSORT extensions for cluster randomised trials, non-inferiority and equivalence trials, non-pharmacological treatments, herbal interventions, and pragmatic trials.  
 17 Additional extensions are forthcoming: for those and for up to date references relevant to this checklist, see [www.consort-statement.org](http://www.consort-statement.org).
